# Supplementary material for: Jugular Vein Injection of High-Titer Lentiviral Vectors Does Not Transduce the Aorta—Brief Report
Source: PubMed Central journal article supplement — Arterioscler Thromb Vasc Biol. 2020 Dec 10;41(3):1149–55. doi: 10.1161/ATVBAHA.120.315125 (PMC7901533; doi:10.1161/atvbaha.120.315125), 2020-12-10
Supplement: atv-41-1149-s001.pdf [file atv-41-1149-s001.pdf]

## **SUPPLEMENTAL MATERIALS**

Jugular-Vein Injection of High-Titer Lentiviral Vectors Does Not Transduce the Aorta

Lianxiang Bi, Bradley K. Wacker, Alexis Stamatikos, Meena Sethuraman, Kaushik Komandur, David A. Dichek

From the Division of Cardiology, Department of Medicine, University of Washington, Seattle (all authors).

## Major Resources Table

In order to allow validation and replication of experiments, all essential research materials listed in the Methods should be included in the Major Resources Table below. Authors are encouraged to use public repositories for protocols, data, code, and other materials and provide persistent identifiers and/or links to repositories when available. Authors may add or delete rows as needed.

### Animals (in vivo studies)

| Species      | Vendor or Source                       | Background Strain | Sex  | Persistent ID / URL                                                               |
|--------------|----------------------------------------|-------------------|------|-----------------------------------------------------------------------------------|
| Mus musculus | The Jackson Laboratory, Bar Harbor, ME | C57BL/6J          | Male | <a href="https://www.jax.org/strain/000664">https://www.jax.org/strain/000664</a> |
|              |                                        |                   |      |                                                                                   |
|              |                                        |                   |      |                                                                                   |

### Genetically Modified Animals

|                 | Species | Vendor or Source | Background Strain | Other Information | Persistent ID / URL |
|-----------------|---------|------------------|-------------------|-------------------|---------------------|
| Parent - Male   |         |                  |                   |                   |                     |
| Parent - Female |         |                  |                   |                   |                     |

### Antibodies

| Target antigen | Vendor or Source            | Catalog # | Working concentration | Lot # (preferred but not required) | Persistent ID / URL                                                                                                                                                       |
|----------------|-----------------------------|-----------|-----------------------|------------------------------------|---------------------------------------------------------------------------------------------------------------------------------------------------------------------------|
| GFP            | Invitrogen, Carlsbad, CA    | A11122    | 1:1000                | 2015993                            | <a href="https://www.thermofisher.com/antibody/product/GFP-Antibody-Polyclonal/A-11122">https://www.thermofisher.com/antibody/product/GFP-Antibody-Polyclonal/A-11122</a> |
| Rabbit IgG     | Vector Labs, Burlingame, CA | PK-4001   | 1:1000                | ZE0717                             | <a href="https://vectorlabs.com/vectastain-abc-kit-rabbit-igg.html">https://vectorlabs.com/vectastain-abc-kit-rabbit-igg.html</a>                                         |

### DNA/cDNA Clones

| Clone Name | Sequence | Source / Repository | Persistent ID / URL |
|------------|----------|---------------------|---------------------|
|            |          |                     |                     |
|            |          |                     |                     |
|            |          |                     |                     |

### Cultured Cells

| Name | Vendor or Source | Sex (F, M, or unknown) | Persistent ID / URL |
|------|------------------|------------------------|---------------------|
|      |                  |                        |                     |
|      |                  |                        |                     |
|      |                  |                        |                     |

### Data & Code Availability

| Description | Source / Repository | Persistent ID / URL |
|-------------|---------------------|---------------------|
|             |                     |                     |
|             |                     |                     |
|             |                     |                     |

**Other**

| Description | Source / Repository | Persistent ID / URL |
|-------------|---------------------|---------------------|
|             |                     |                     |
|             |                     |                     |
|             |                     |                     |

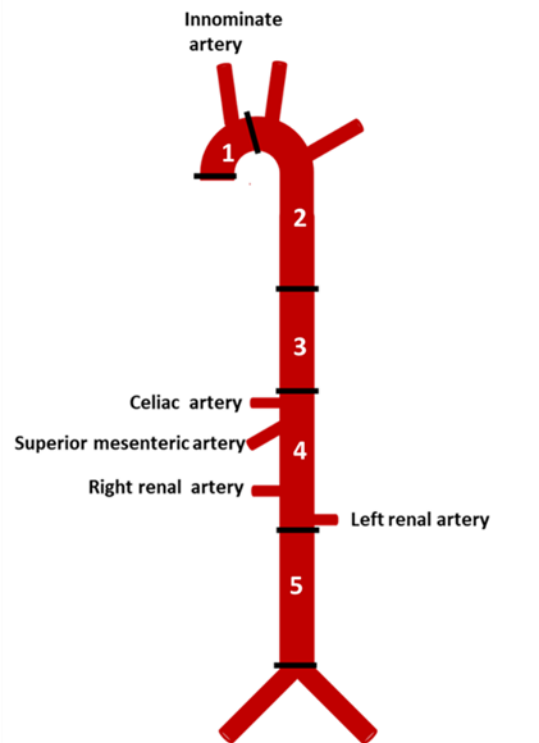

**Figure I. Sectioning protocol for mouse aortas.** Aortas were divided at 6 locations (black bars). Segments 2 and 4 were processed for DNA extraction. Segments 1, 3, and 5 were processed for immunostaining.

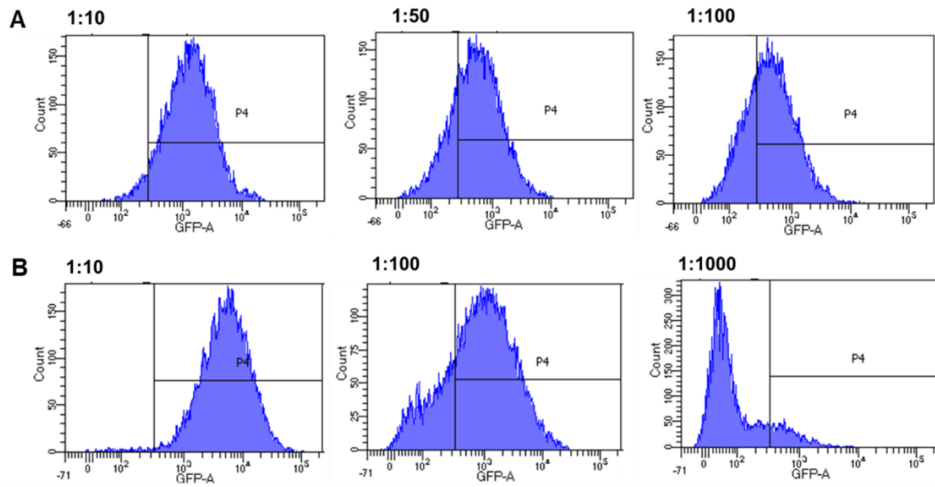

**Figure II. Titration of green fluorescent protein (GFP)-expressing lentivirus (LV-GFP) by flow cytometry.** Live Jurkat cells were analyzed for GFP fluorescence after exposure to LV-GFP either obtained from Dr. Juan Miguel Redondo (A) or prepared by the Fred Hutch viral vector core (B). The dilutions of LV-GFP used to generate each histogram are indicated.

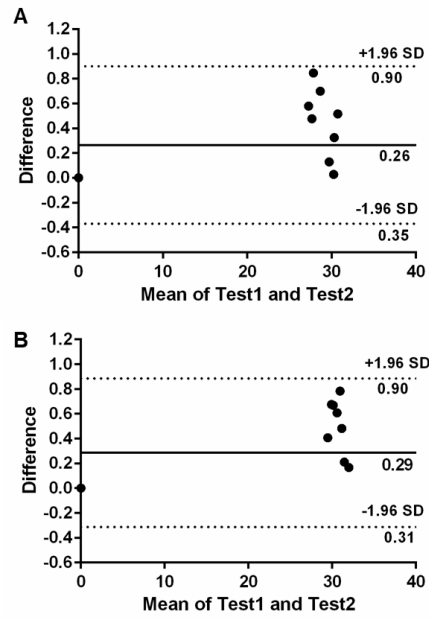

**Figure III. Bland-Altman plots comparing repeat measurements of vector DNA.** Extracts of (A) spleen and (B) liver (n=8 each), removed 4 days after injection of a lentiviral vector expressing GFP, were analyzed by quantitative PCR that detects the GFP sequence. The plots compare quantification cycle (Cq) values of duplicate reactions performed independently.

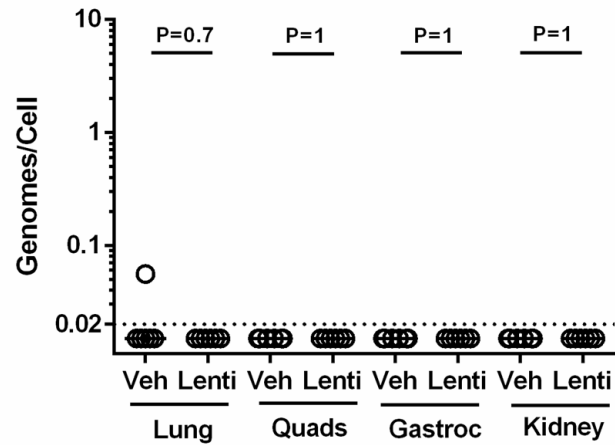

**Figure IV. No transduction of lung, muscle, or kidney after in vivo lentiviral vector (LV) injection.** LV genomes per diploid cell were measured by quantitative PCR for the GFP sequence, performed on DNA extracted from indicated tissues, with reference to a standard curve (see Figure 1A in the main manuscript). Data are from left-sided lung, muscles and kidney; for right-sided results, see Figure 1 in the main manuscript. Dotted line=limit of detection; data points are from individual mice; P values are from Mann-Whitney rank-sum test. Veh=vehicle-injected (n=6 for all tissues); Lenti=lentivirus-GFP injected (n=8 for all tissues); Gastroc=gastrocnemius; Quads=quadriceps.
